# Supplementary material for: Significantly enhanced lung metastasis and reduced organ NK cell functions in diet-induced obese rats
Source: PubMed Central journal article supplement (PMC5496225; doi:10.1186/s40608-017-0161-5), 2017-07-03
Supplement: 40608_2017_161_MOESM1_ESM.pdf [file 40608_2017_161_MOESM1_ESM.pdf]

**Additional table 1.** Characteristics of the specific primers used for *real-time* RT-PCR analysis

| Gene                          | Forward and reversed primers                                        | bp  | Annealing temperature | NCBI gene bank |
|-------------------------------|---------------------------------------------------------------------|-----|-----------------------|----------------|
| <b>Cyp18</b>                  | for: 5' GTGTTCTTCGACATCACG 3'<br>rev: 5' AAGTTTTCTGCTGTCTTTGG 3'    | 92  | 61°C                  | NM_017101      |
| <b>NCR1/NKp46</b>             | for: 5' AGACCCTGTTTCTTCTCTTG 3'<br>rev: 5' TGAGCTTCTCATGATCCTTC 3'  | 197 | 63°C                  | NM_057199      |
| <b>NCR3/NKp30</b>             | for: 5' AAGAGCCTCCTCAACAAG 3'<br>rev: 5' AGAAAGCTGAGGGCATAG 3'      | 94  | 57°C                  | NM_181822      |
| <b>Klra1/Ly49</b>             | for: 5' CCTGTGTCAACCAAAGAAAG 3'<br>rev: 5' ATAATTCGCGAAACAGAGAG 3'  | 181 | 57°C                  | NM_001009486   |
| <b>Klrk1/NKG2D</b>            | for: 5' TTAATGAGAACAAAGCCTGG 3'<br>rev: 5' GTTAACTCGTTGGGTGATAG 3'  | 199 | 61°C                  | NM_133512      |
| <b>TNFSF10/TRAIL</b>          | for: 5' CTCTACAGTTCCAGAAAAGC 3'<br>rev: 5' CCTTGGAGATTGGAATTAAGG 3' | 128 | 60°C                  | NM_145681      |
| <b>TNF<math>\alpha</math></b> | for: 5' TCTTCTGTCTACTGAACTTCG 3'<br>rev: 5' AAGATGATCTGAGTGTGAGG 3' | 111 | 56°C                  | NM_012675      |

**Cyp18** cyclophilin A; **NCR1/NKp46** natural cytotoxicity triggering receptor 1; **NCR3/NKp30** natural cytotoxicity triggering receptor 3; **Klra1/Ly49** killer cell lectin-like receptor, subfamily A, member 1; **Klrk1/NKG2D** killer cell lectin like receptor k1/natural killer group 2D; **TNFSF10/TRAIL** tumor necrosis factor (ligand) superfamily, member 10/ tumor necrosis factor related apoptosis inducing ligand; **TNF $\alpha$**  tumor necrosis factor  $\alpha$
