# Supplementary material for: Significantly enhanced lung metastasis and reduced organ NK cell functions in diet-induced obese rats
Source: PubMed Central journal article supplement (PMC5496225; doi:10.1186/s40608-017-0161-5), 2017-07-03
Supplement: 40608_2017_161_MOESM2_ESM.pdf [file 40608_2017_161_MOESM2_ESM.pdf]

**Additional table 2.** Relative mRNA concentrations of NK cell receptors and cytokines in spleen of rats in short-term experiment

|                      | <i>activating NK cell receptors</i> |                   |                    | <i>cytokines</i>              |
|----------------------|-------------------------------------|-------------------|--------------------|-------------------------------|
| <b>Groups</b>        | <b>NCR1/NKp46</b>                   | <b>NCR3/NKp30</b> | <b>Klrk1/NKG2D</b> | <b>TNF<math>\alpha</math></b> |
| <b>One-way ANOVA</b> | <i>relative mRNA concentrations</i> |                   |                    |                               |
| control/NaCl         | 1.0 $\pm$ 0.1                       | 1.0 $\pm$ 0.1     | 1.0 $\pm$ 0.05     | 1.0 $\pm$ 0.2                 |
| DIO/NaCl             | 0.9 $\pm$ 0.1                       | 1.1 $\pm$ 0.1     | 0.8 $\pm$ 0.1      | 0.7 $\pm$ 0.1                 |
| control/MADB106      | 1.1 $\pm$ 0.1                       | 1.1 $\pm$ 0.05    | 1.1 $\pm$ 0.1      | 1.0 $\pm$ 0.1                 |
| DIO/MADB106          | 1.1 $\pm$ 0.1                       | 1.4 $\pm$ 0.3     | 1.0 $\pm$ 0.05     | 1.1 $\pm$ 0.1                 |
| <b>Two-way ANOVA</b> | <i>p</i>                            |                   |                    |                               |
| diet                 | 0.53                                | 0.26              | 0.21               | 0.64                          |
| MADB106              | 0.15                                | 0.34              | 0.09               | 0.17                          |
| diet x MADB106       | 0.51                                | 0.52              | 0.33               | 0.10                          |

Values represent means  $\pm$  SEM, n=8 rats/group for one-way ANOVA. For two-way ANOVA p-values are shown for the main factors diet, MADB106 and the interaction of both main factors.
