# Supplementary material for: Significantly enhanced lung metastasis and reduced organ NK cell functions in diet-induced obese rats
Source: PubMed Central journal article supplement (PMC5496225; doi:10.1186/s40608-017-0161-5), 2017-07-03
Supplement: 40608_2017_161_MOESM3_ESM.pdf [file 40608_2017_161_MOESM3_ESM.pdf]

**Additional table 3.** Relative mRNA concentrations of NK cell receptors and cytokines in spleen of rats in long-term experiment

|                      | <i>NK cell receptors</i>            |                   | <i>cytokines</i>              |                      |
|----------------------|-------------------------------------|-------------------|-------------------------------|----------------------|
|                      | <i>activating</i>                   | <i>inhibiting</i> |                               |                      |
| <b>Groups</b>        | <b>NCR3/NKp30</b>                   | <b>Klra1/Ly49</b> | <b>TNF<math>\alpha</math></b> | <b>TNFSF10/TRAIL</b> |
| <b>One-way ANOVA</b> | <i>relative mRNA concentrations</i> |                   |                               |                      |
| control/NaCl         | 1.0 $\pm$ 0.1                       | 1.0 $\pm$ 0.05    | 1.0 $\pm$ 0.1                 | 1.0 $\pm$ 0.1        |
| DIO/NaCl             | 1.3 $\pm$ 0.3                       | 0.9 $\pm$ 0.1     | 1.5 $\pm$ 0.3                 | 1.5 $\pm$ 0.5        |
| control/MADB106      | 0.8 $\pm$ 0.1                       | 1.0 $\pm$ 0.1     | 1.0 $\pm$ 0.2                 | 0.9 $\pm$ 0.1        |
| DIO/MADB106          | 1.1 $\pm$ 0.1                       | 0.9 $\pm$ 0.1     | 1.0 $\pm$ 0.1                 | 1.0 $\pm$ 0.2        |
| <b>Two-way ANOVA</b> | <i>p</i>                            |                   |                               |                      |
| diet                 | 0.11                                | 0.20              | 0.21                          | 0.22                 |
| MADB106              | 0.21                                | 0.79              | 0.22                          | 0.26                 |
| diet x MADB106       | 0.74                                | 0.89              | 0.29                          | 0.38                 |

Values represent means  $\pm$  SEM, n=8 rats/group for one-way ANOVA. For two-way ANOVA p-values are shown for the main factors diet, MADB106 and the interaction of both main factors.
